# Supplementary material for: Phenotypic Heterogeneity and Plasticity of Cancer Cell Migration in a Pancreatic Tumor Three-Dimensional Culture Model
Source: MDPI journal article supplement (doi:10.3390/cancers12051305), 2020-05-21
Supplement: s1 [file s1]

## Supplementary Materials

# Phenotypic Heterogeneity and Plasticity of Cancer Cell Migration in a Pancreatic Tumor Three-Dimensional Culture Model

Seul-Ki Kim, So Dam Jang, Hyunho Kim, Seok Chung, Jong Kook Park and Hyo-Jeong Kuh

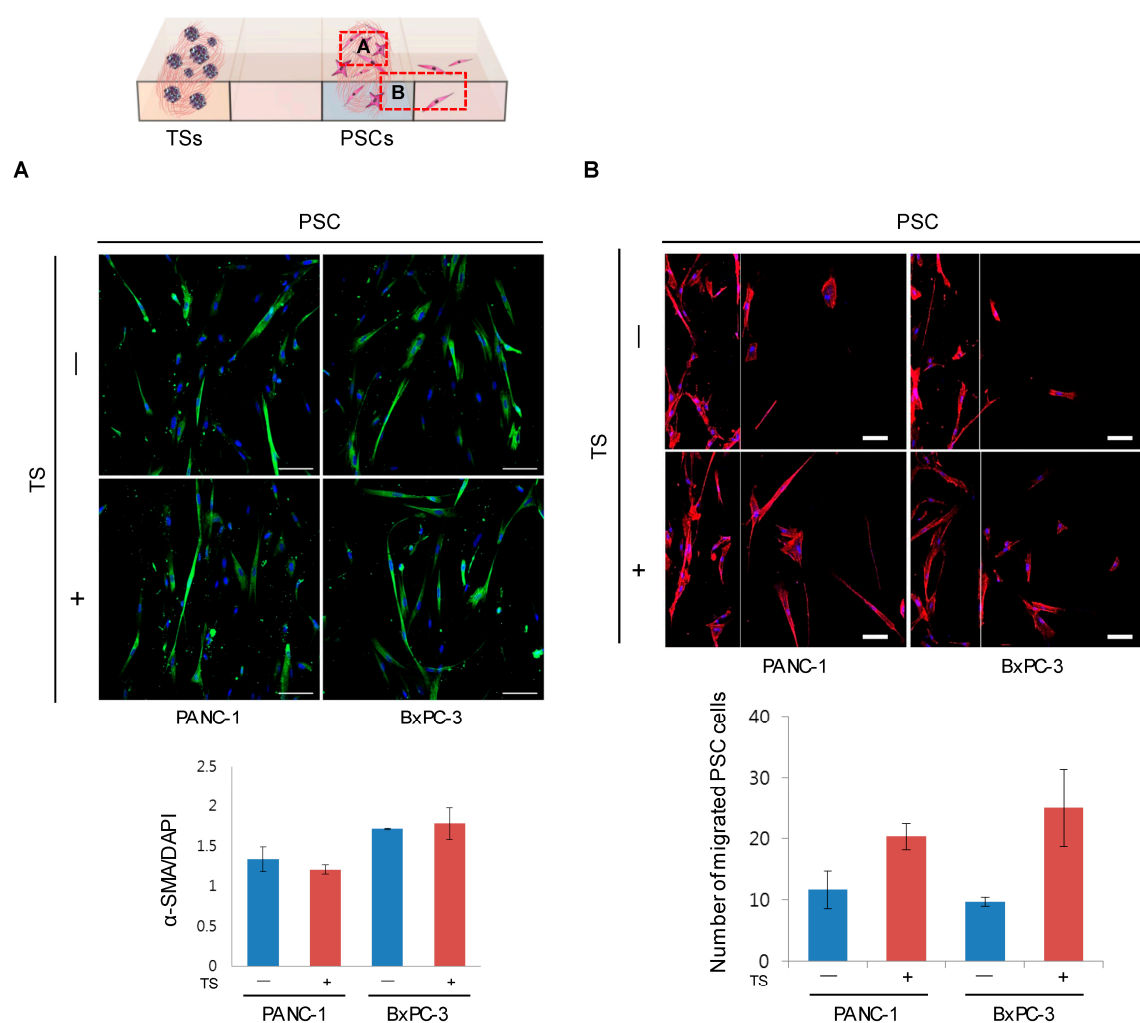

**Figure S1.** Expression of  $\alpha$ -SMA and migration of PSCs when co-cultured with or without tumor spheroids (TSs). No significant difference in the level of  $\alpha$ -SMA (**A**) and number of cells migrated out of collagen channels (**B**) under TSs co-culture conditions. Cells were grown for 5 days in collagen-supported microchannel chips. Scale bar: 100  $\mu$ m.

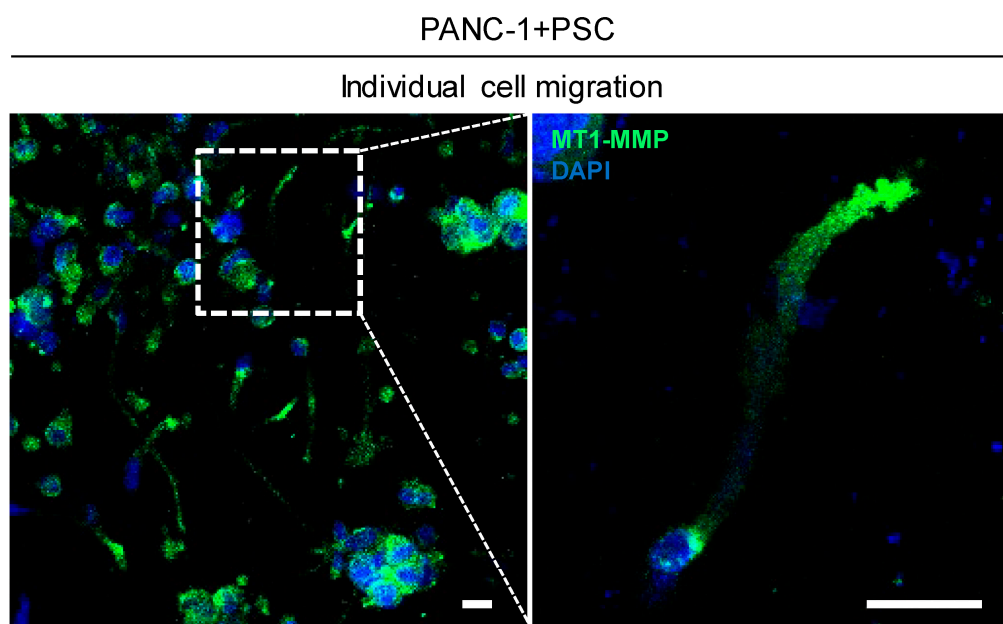

**Figure S2.** Expression of MT1-MMP in PANC-1 cells migrating with invadopodia. Cells were cultured in a 3D collagen matrix for 5 days and immunostaining was performed without a permeabilization step. Scale bar: 20  $\mu$ m.

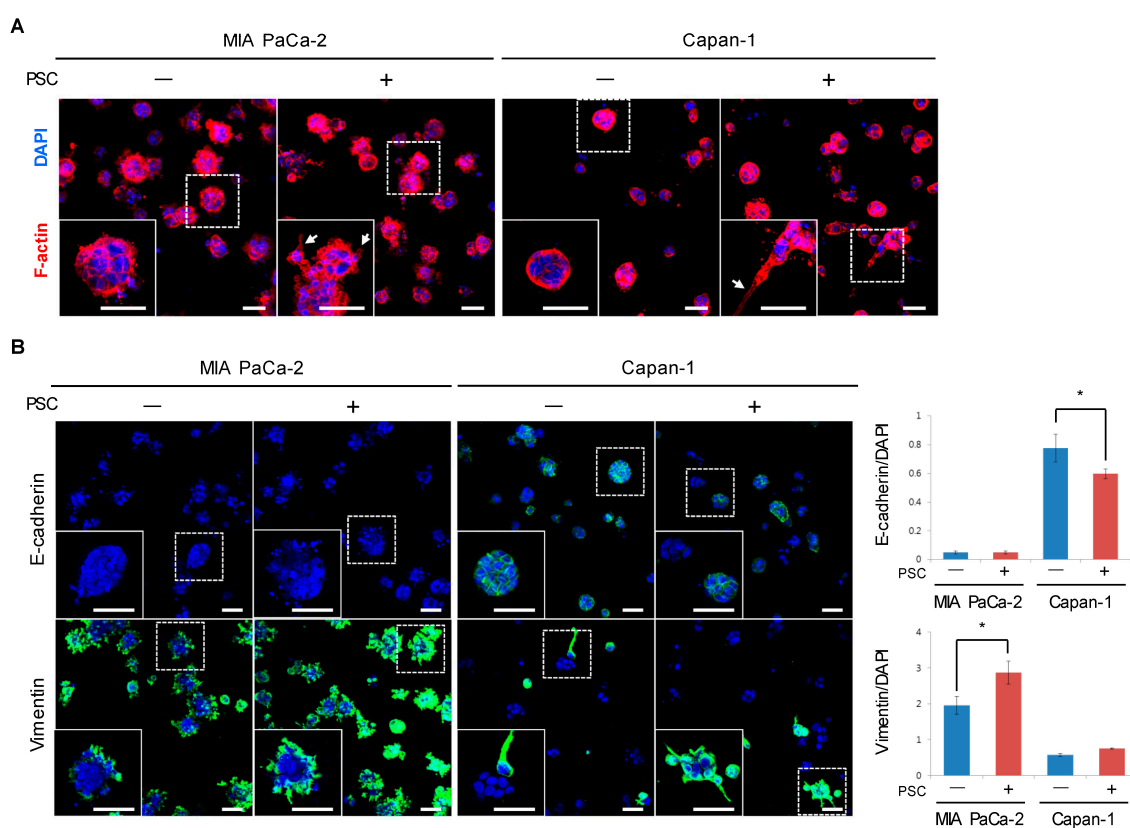

**Figure S3.** Formation of tumor spheroids (TSs) of MIA PaCa-2 and Capan-1 cells and expression of EMT markers when co-cultured with or without PSCs. (A) Morphology of membrane protrusion shown by actin-based podia (white arrow). (B) Expression of EMT marker proteins E-cadherin and

vimentin. Cells were grown for 5 days in collagen-supported microchannel chips and stained with F-actin, E-cadherin, vimentin and DAPI. Scale bar: 50  $\mu$ m. \*  $p < 0.05$ .

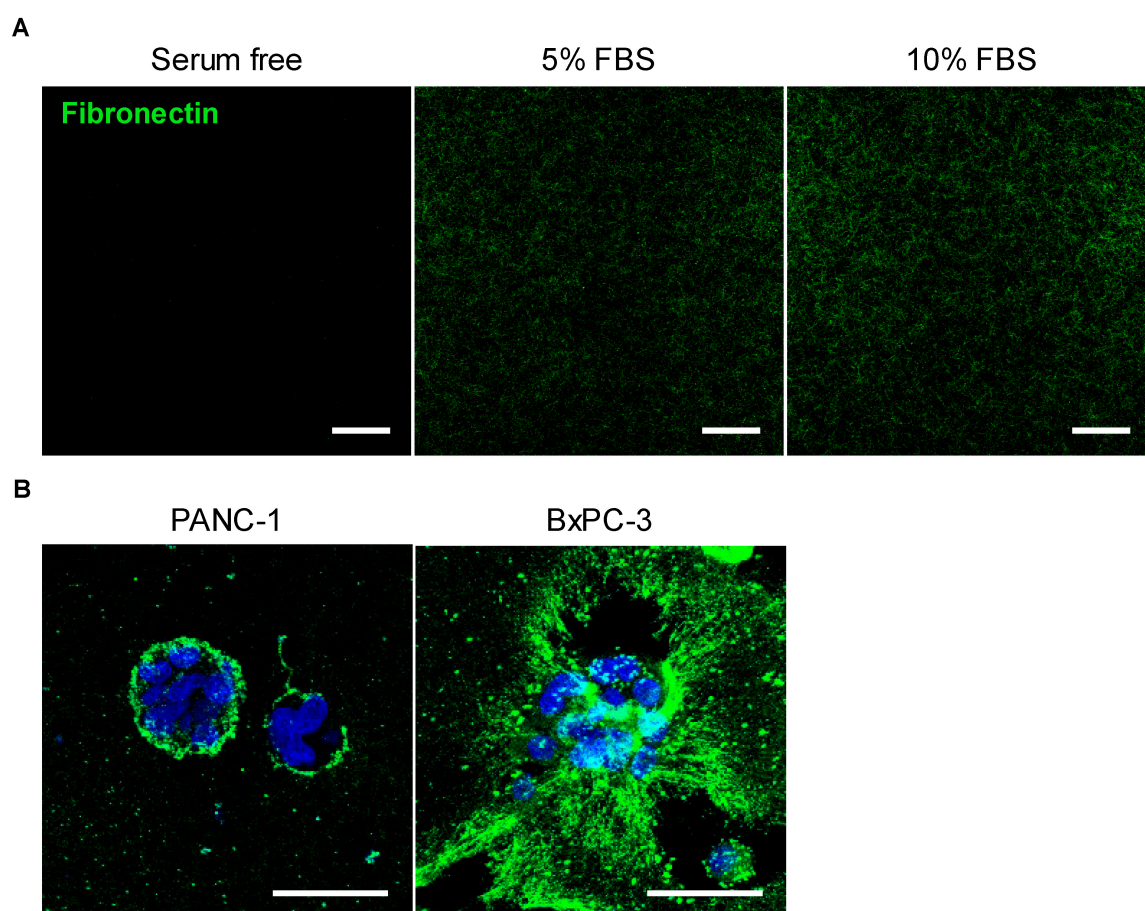

**Figure S4.** (A) Expression of fibronectin with or without serum in a cell-free collagen matrix. (B) Expression of fibronectin in regions close to the TSs of PANC-1 and BxPC-3 cells. Immunostaining was performed at day 5 of culture. Scale bar: 50  $\mu$ m (A, B).

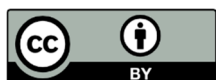

© 2020 by the authors. Licensee MDPI, Basel, Switzerland. This article is an open access article distributed under the terms and conditions of the Creative Commons Attribution (CC BY) license (<http://creativecommons.org/licenses/by/4.0/>).
